# Supplementary material for: Bioactive silica–poly(γ-glutamic acid) hybrids for bone regeneration: effect of covalent coupling on dissolution and mechanical properties and fabrication of porous scaffolds
Source: Royal Society of Chemistry journal article supplement (doi:10.1039/c2sm00033d), 2012-01-01
Supplement: c2sm00033d.pdf [file c2sm00033d.pdf]

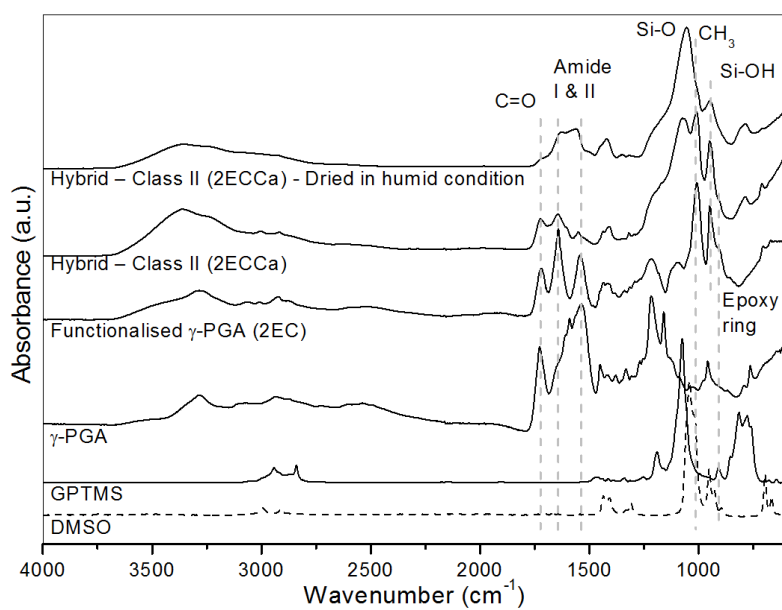

FTIR spectra of: DMSO; GPTMS;  $\gamma$ -PGA; functionalised  $\gamma$ -PGA (2EC); a class II silica (+ CaCl<sub>2</sub>) /  $\gamma$ -PGA hybrid (2ECCa); and the same hybrid dried under humid conditions.
